# Supplementary material for: Gallium-Doped Hydroxyapatite Shows Antibacterial Activity against Pseudomonas aeruginosa without Affecting Cell Metabolic Activity
Source: MDPI journal article supplement (doi:10.3390/jfb14020051), 2023-01-17
Supplement: s1 [file s1]

## Supplementary data

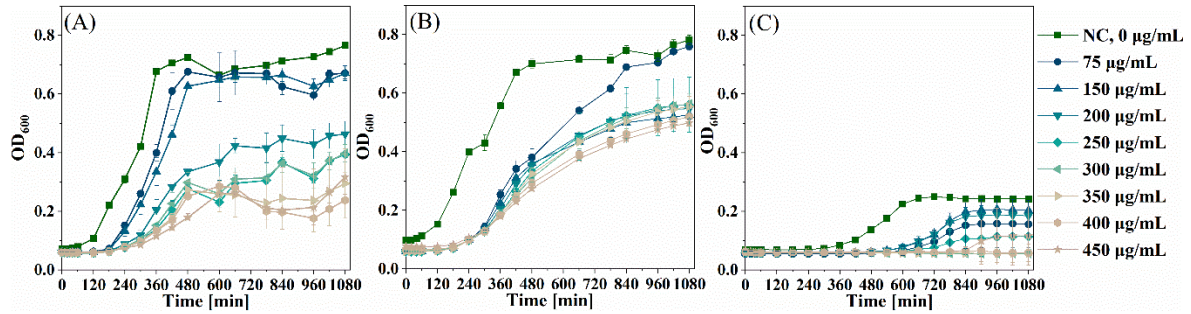

**Figure S1.** Growth curves in the presence of  $\text{Ga}(\text{NO}_3)_3 \cdot 4.2\text{H}_2\text{O}$  at different concentrations of (A) *E. coli* (B) *S. epidermidis* and (C) *S. pyogenes*

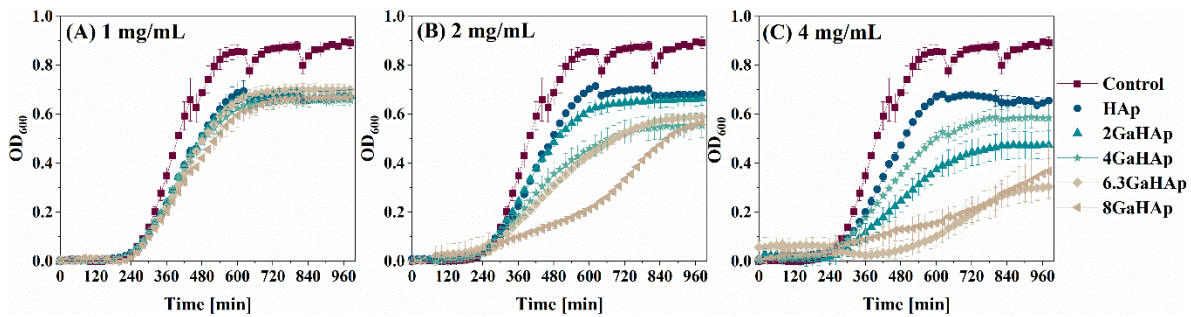

**Figure S2.** *S. epidermidis* growth curves in the presence of GaHAp powder suspension in TSB at different concentrations

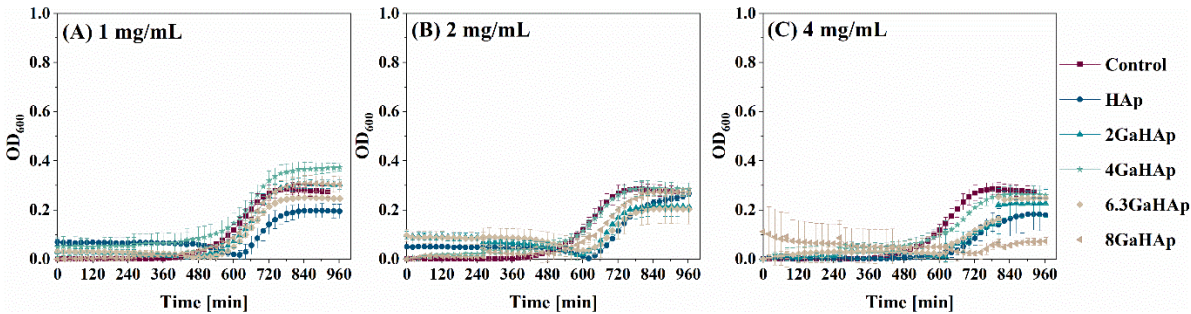

**Figure S3.** *S. pyogenes* growth curves in the presence of GaHAp powder suspension in TBS at different concentrations

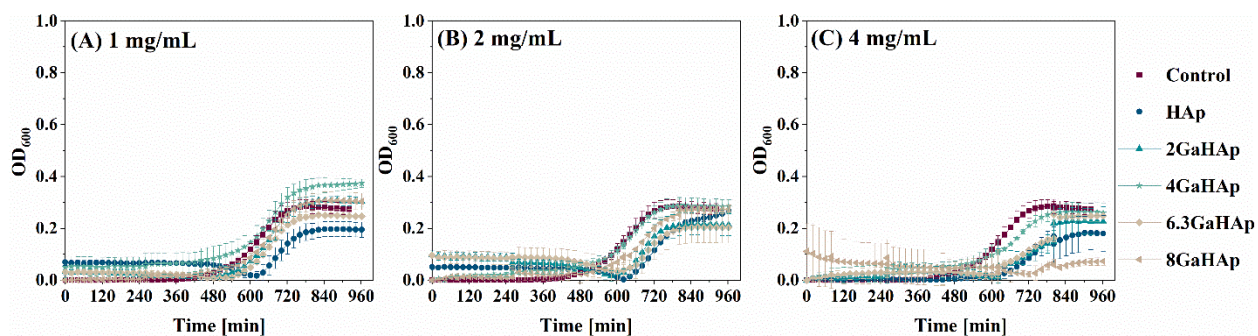

**Figure S4.** *E. coli* growth curves in the presence of GaHAp powder suspension at different concentrations

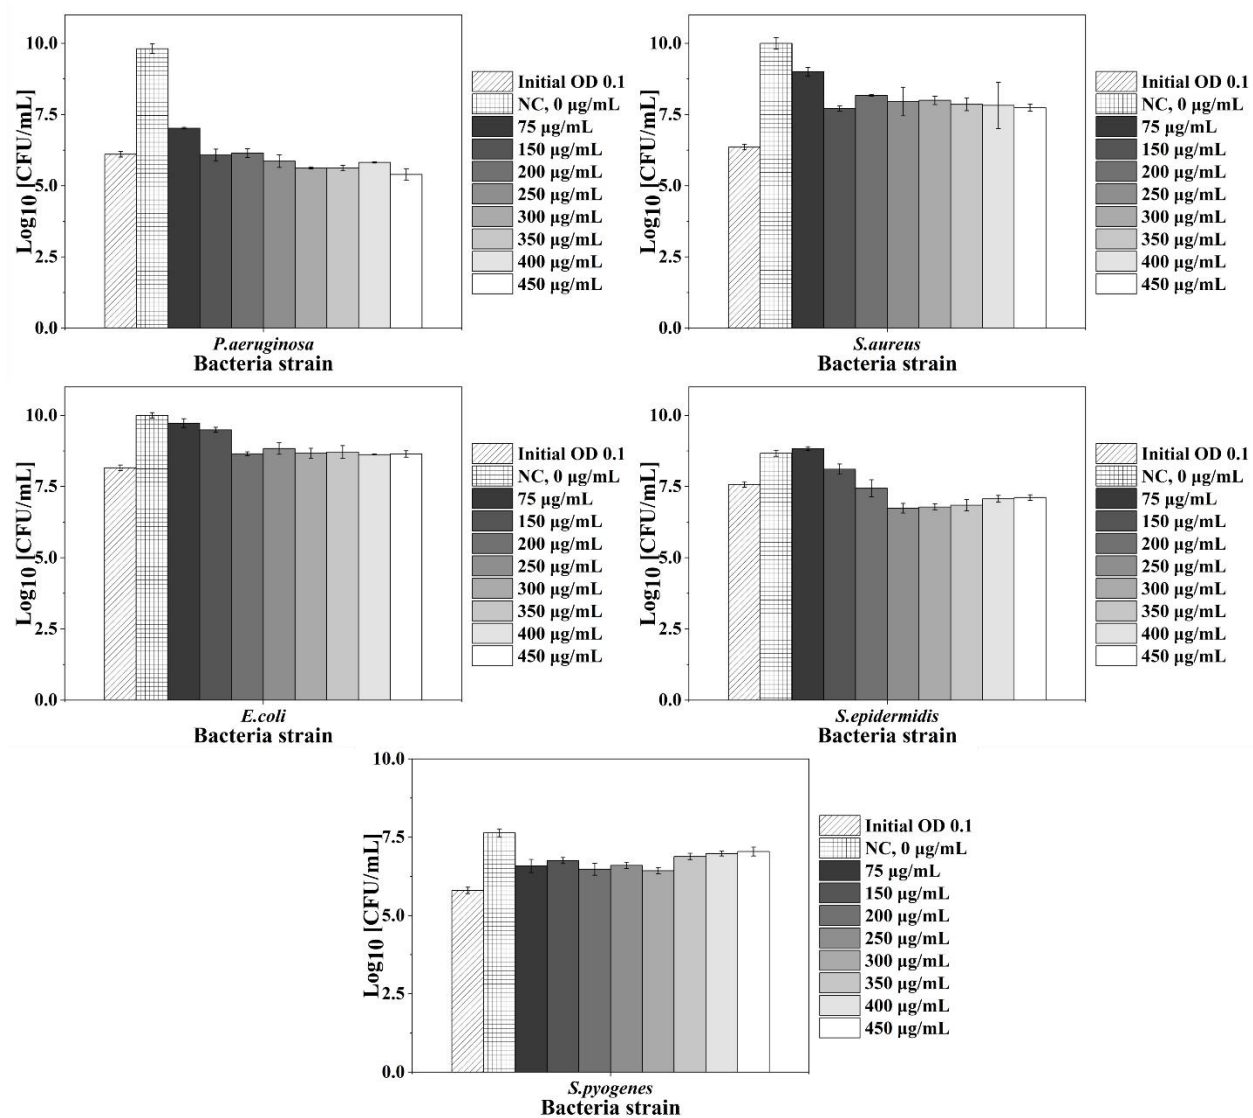

**Figure S5.** The minimal inhibitory concentration of  $\text{Ga}(\text{NO}_3)_3 \cdot 4.2\text{H}_2\text{O}$  against 5 bacteria species

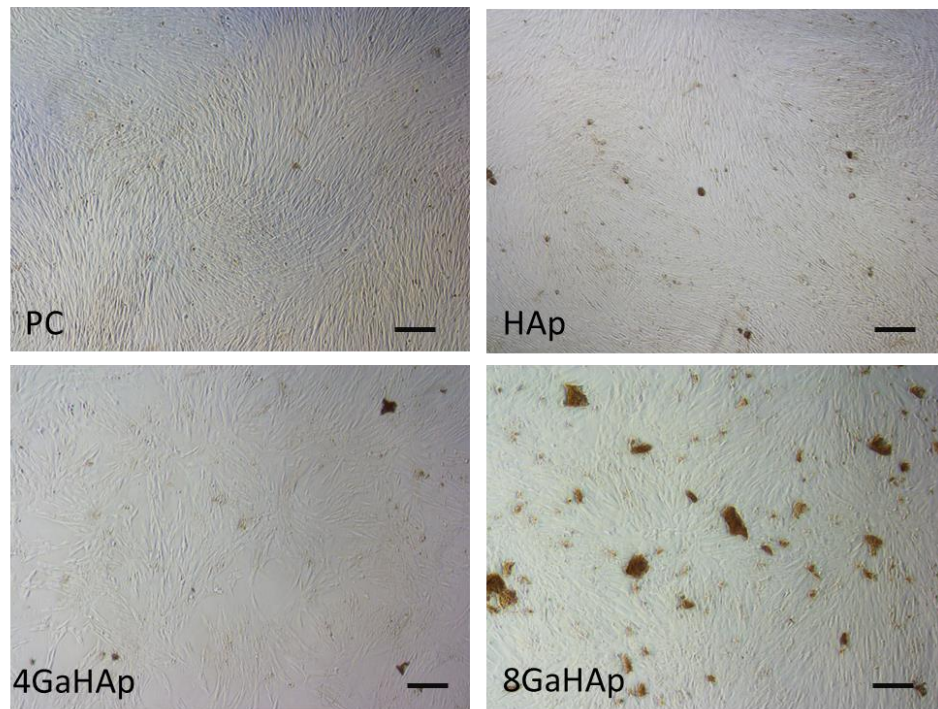

**Figure S6.** Human fibroblasts (hTERT-BJ1) were exposed to GaHAp by indirect test on day 3. PC-positive control; scale bar – 200  $\mu\text{m}$ .

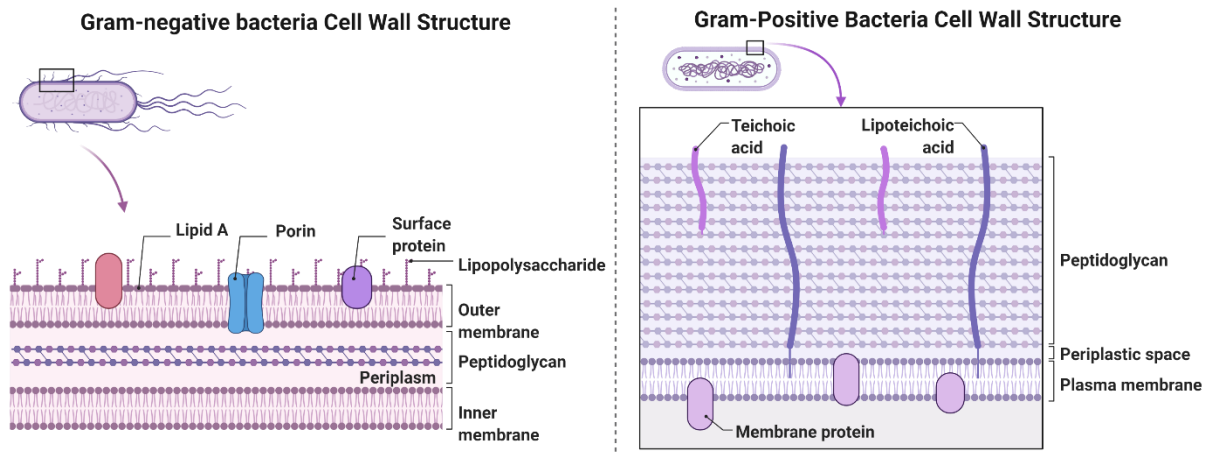

**Figure S7.** The structural difference between Gram-negative and Gram-positive bacteria (created by Biorender.com)
